# Supplementary material for: pFe3+ determination of multidentate ligands by a fluorescence assay
Source: Royal Society of Chemistry journal article supplement (doi:10.1039/c5an00123d), 2015-01-01
Supplement: c5an00123d1.pdf [file c5an00123d1.pdf]

### Supplementary Information

pFe<sup>3+</sup> Determination of Multidentate Ligands by a Fluorescence Assay

Yongmin Ma, Tao Zhou and Robert C Hider

#### Structures of Ligands

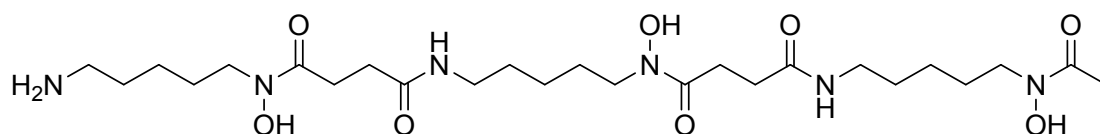

L1

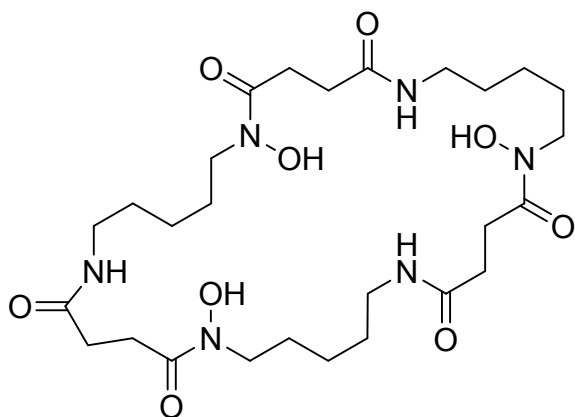

L2

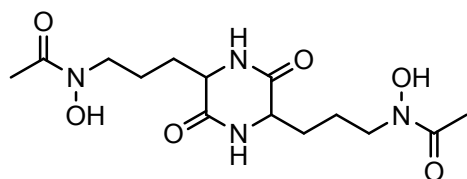

L3

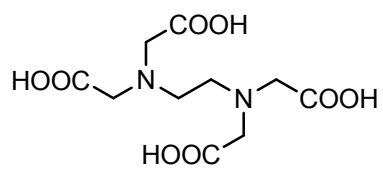

**L4**

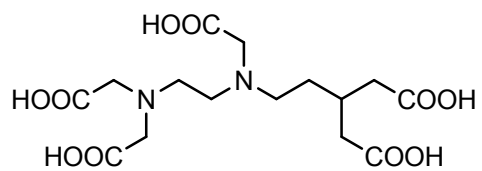

**L5**

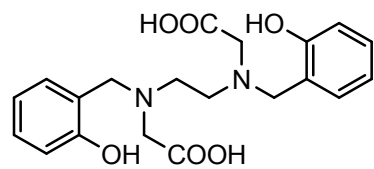

**L6**

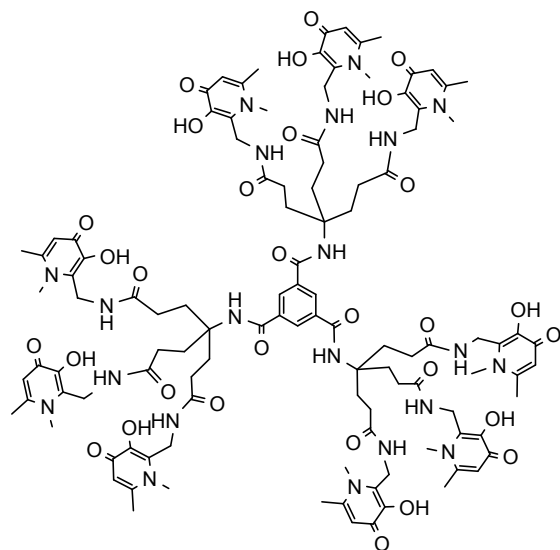

L7

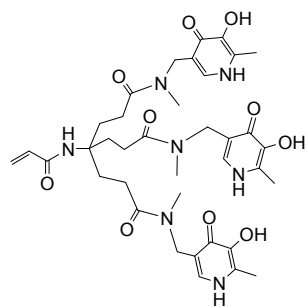

L8

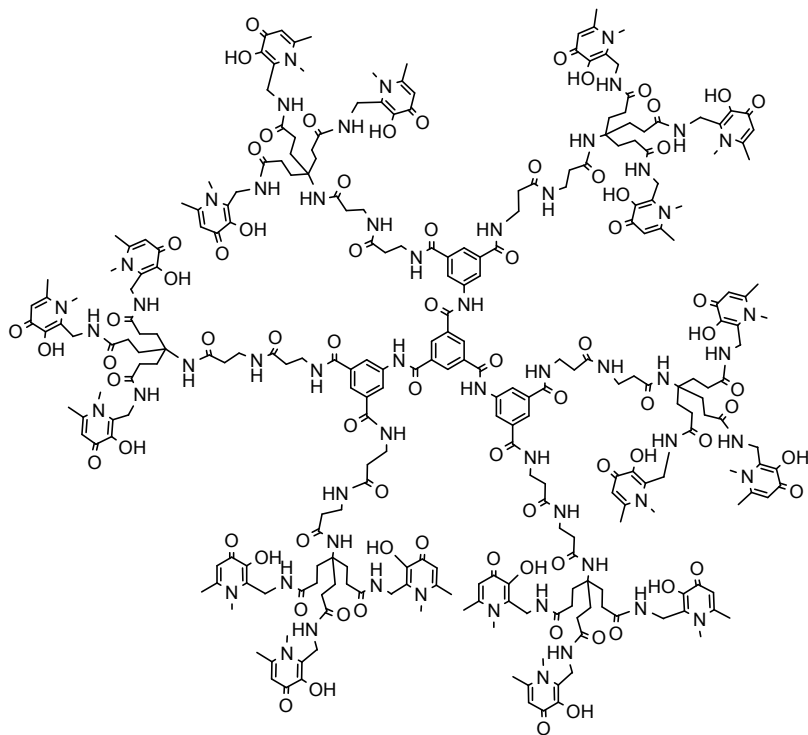

**L9**

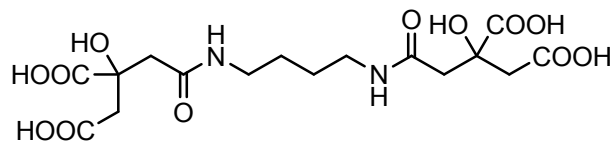

**L10**

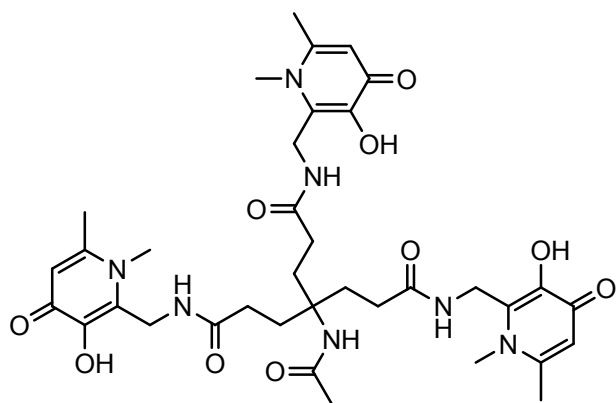

**L11**

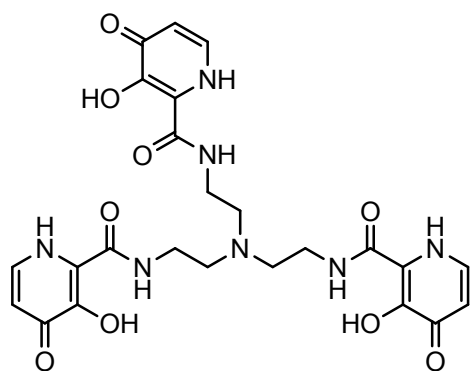

**L12**

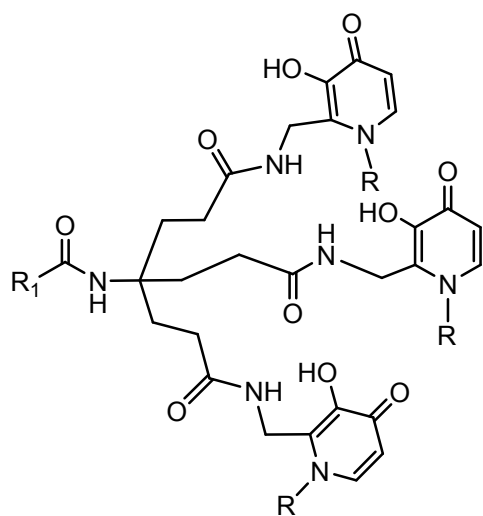

**L13:**  $R_1 = \text{CH}_3$ ,  $R = \text{CH}_3$

**L14:**  $R_1 = n\text{-C}_3\text{H}_7$ ,  $R = \text{C}_2\text{H}_5$

**L15:**  $R_1 = \text{CH}_3\text{O}(\text{CH}_2\text{CH}_2\text{O})_2\text{CH}_2$ ,  $R_1 = \text{C}_2\text{H}_5$

**L16:**  $R_1 = \text{CH}_3$ ,  $R = n\text{-C}_4\text{H}_9$

**L17:**  $R_1 = n\text{-C}_3\text{H}_7$ ,  $R = n\text{-C}_4\text{H}_9$

**L18:**  $R_1 = \text{CH}_3\text{O}(\text{CH}_2\text{CH}_2\text{O})_2\text{CH}_2$ ,  $R = n\text{-C}_4\text{H}_9$

**L19:**  $R_1 = \text{CH}_3\text{O}(\text{CH}_2\text{CH}_2\text{O})_2\text{CH}_2$ ,  $R = n\text{-C}_6\text{H}_{13}$

**L20:**  $R_1 = n\text{-C}_3\text{H}_7$ ,  $R = \text{CH}_2\text{CH}_2\text{OH}$

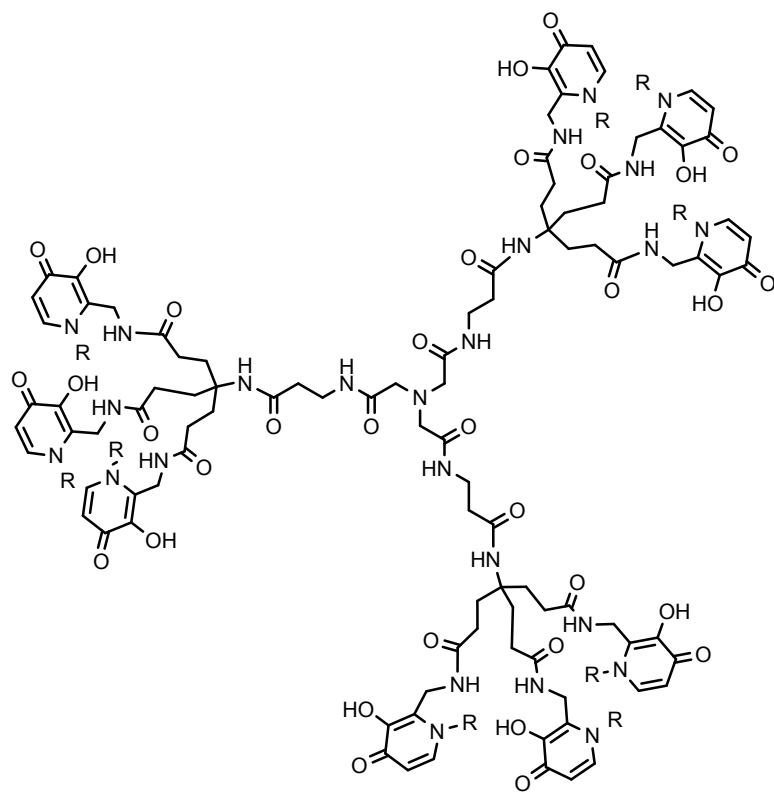

**L21:**  $R = \text{CH}_2\text{CH}_2\text{OH}$

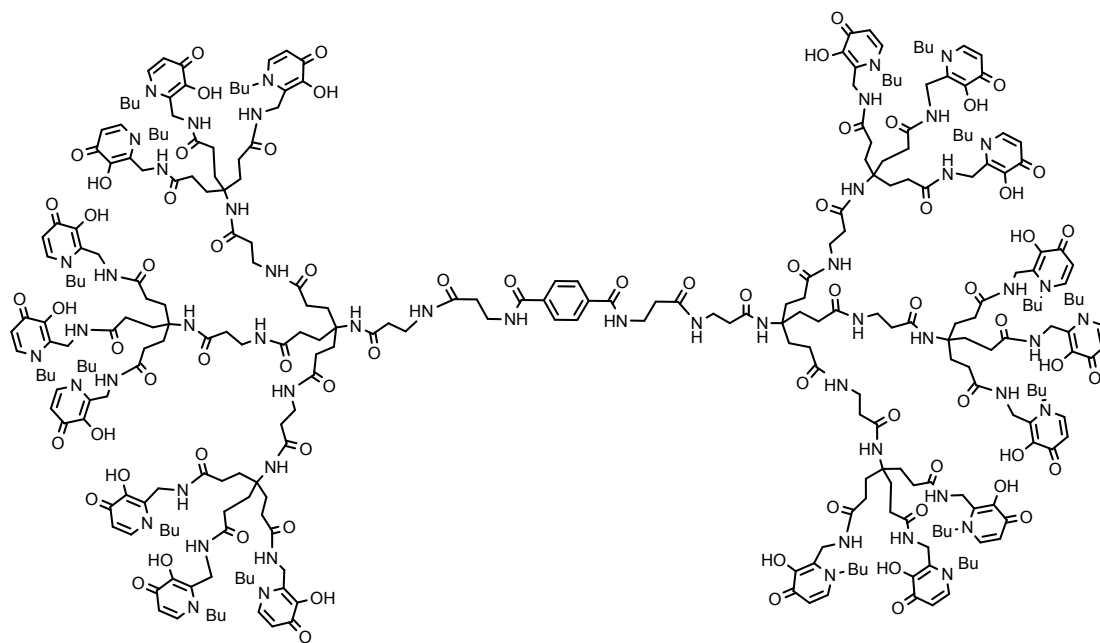

**L22**

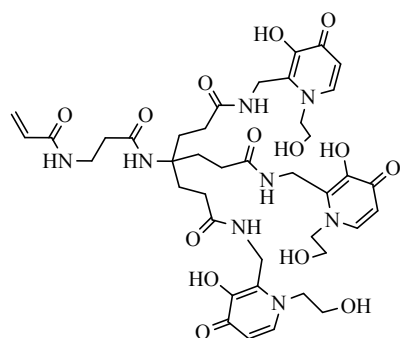

**L23**

**L24:** Polymer of **L23** and iron binding capacity at 291  $\mu\text{mol/g}$ .

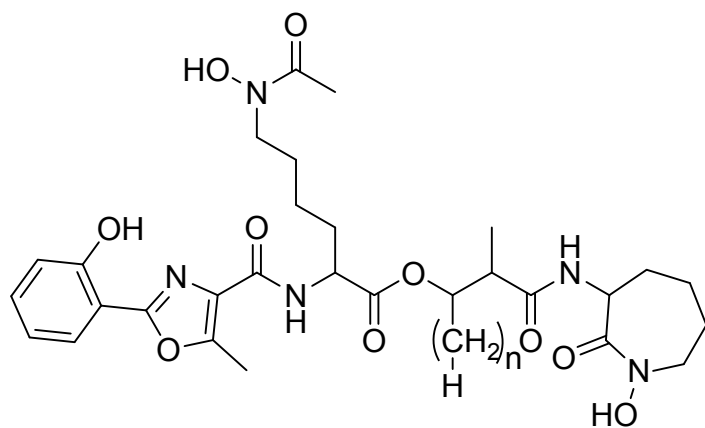

L25

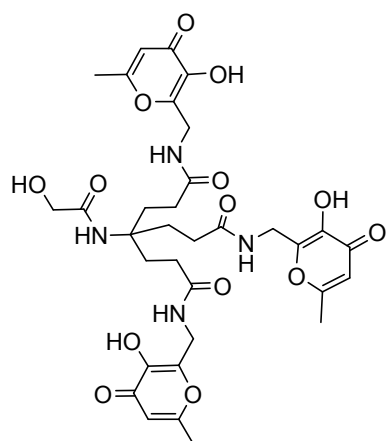

L26

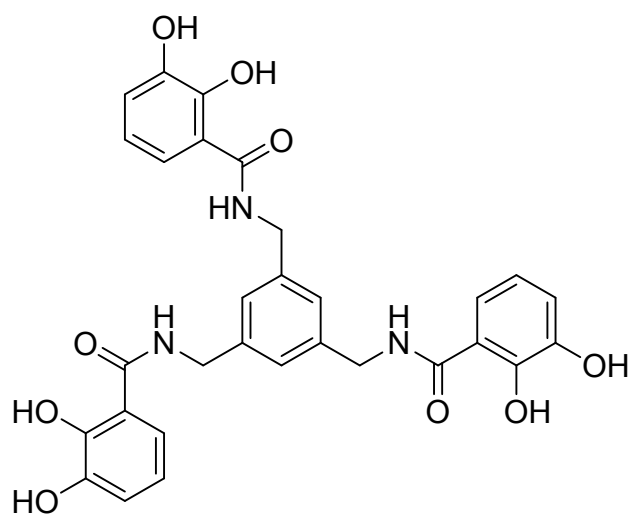

L27



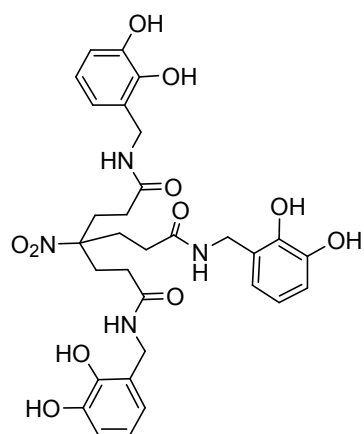

**L28**

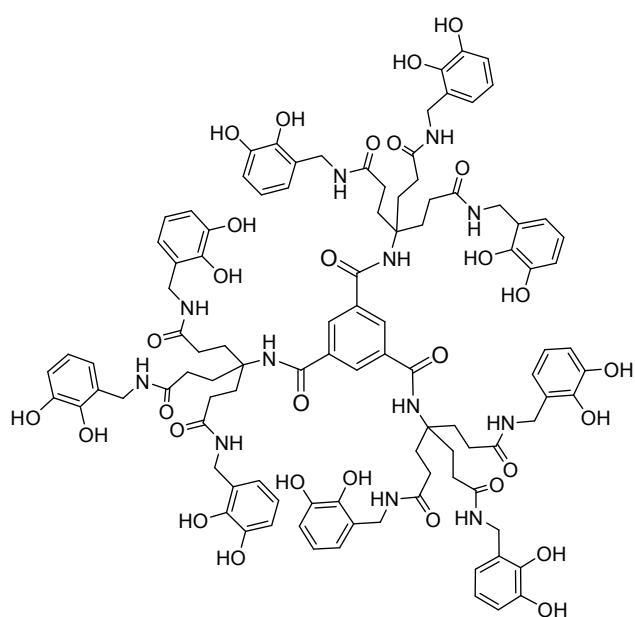

**L29**

**Calculation of unknown pFe value of hexadentate ligand based on the pFe value of the competing ligand and the relative fluorescence**

Hexadentate ligands have simple equilibrium constants as indicated in Eq. 1 and 2. The competition between the two hexadentate ligands for iron is presented in Eq. 3.

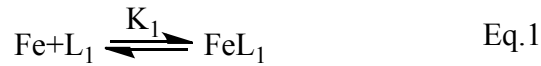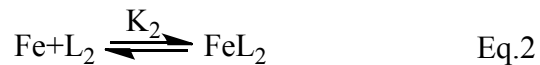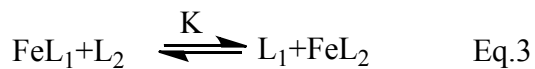

The equilibrium constants  $K_1$ ,  $K_2$  and  $K$  can be written as follows:

$$K_1 = [\text{FeL}_1] / [\text{Fe}][\text{L}_1]$$

$$K_2 = [\text{FeL}_2] / [\text{Fe}][\text{L}_2]$$

$$K = [\text{L}_1][\text{FeL}_2] / [\text{FeL}_1][\text{L}_2]$$

If  $\text{L}_1$  represents CP691 and  $\text{L}_2$  represents DFO, then based on the exponential curve in Figure 3, at 50% relative fluorescence, the ratio of  $[\text{L}_2]_{\text{total}} / [\text{L}_1]_{\text{total}} = 125$ . As  $[\text{L}_1]_{\text{total}} = [\text{Fe}]_{\text{total}} = 6 \mu\text{M}$ , then  $[\text{L}_2]_{\text{total}} = 750 \mu\text{M}$ , and the point of 50% fluorescence occurs at  $[\text{L}_1] = 3 \mu\text{M}$ .

$$\text{As } [\text{L}_1]_{\text{total}} = [\text{L}_1] + [\text{FeL}_1],$$

$$[\text{FeL}_1] \text{ can be calculated by the equation } [\text{FeL}_1] = [\text{L}_1]_{\text{total}} - [\text{L}_1] = 3 \mu\text{M}$$

As  $[\text{Fe}]_{\text{total}} = [\text{Fe}] + [\text{FeL}_1] + [\text{FeL}_2]$  and the ligands are in excess and  $[\text{Fe}]$  is very low,  $[\text{FeL}_2] \approx [\text{Fe}]_{\text{total}} - [\text{FeL}_1] = 3 \mu\text{M}$ .

$$\text{As } [\text{L}_2]_{\text{total}} = [\text{L}_2] + [\text{FeL}_2], \text{ so } [\text{L}_2] = [\text{L}_2]_{\text{total}} - [\text{FeL}_2] = 750 - 3 = 747 \mu\text{M}.$$

$$\text{Therefore, } K = (3 \mu\text{M} \times 3 \mu\text{M}) / (3 \mu\text{M} \times 747 \mu\text{M}) = 1 / 249$$

$$\text{As } K = [\text{L}_1][\text{FeL}_2] / [\text{FeL}_1][\text{L}_2] = ([\text{L}_1](K_2[\text{Fe}][\text{L}_2]) / (K_1[\text{Fe}][\text{L}_1][\text{L}_2])) = K_2 / K_1$$

At the condition of  $[L] = 10 \mu\text{M}$ ,  $[\text{Fe}] = 1 \mu\text{M}$  and pH 7.4,  $[\text{Fe}] = 2.5 \times 10^{-27} \mu\text{M}$  when  $L = \text{DFO}$  ( $\text{pFe}^{3+} = 26.6$ ),

Thus  $K_2 = [\text{FeL}_2] / [\text{Fe}][\text{L}_2] = 1 \mu\text{M} / (2.5 \times 10^{-27} \mu\text{M} \times 9 \mu\text{M})$

$K_1 = [\text{FeL}_1] / [\text{Fe}][\text{L}_1] = 1 \mu\text{M} / ([\text{Fe}]_{\text{L}_1} \times 9 \mu\text{M})$  ( $\text{L}_1 = \text{CP691}$ )

So  $[\text{Fe}]_{\text{L}_1} = 1 / (9K_1) = 1 / (9 \times (K_2 / K)) = K / (9K_2) = (1 / 249) / (9 \times (1 / (9 \times 2.5 \times 10^{-27} \mu\text{M}))) = 1 \times 10^{-29} \mu\text{M}$

Therefore,  $\text{pFe}_{\text{L}_1} = 29.0$ . In fact, the  $\text{pFe}_{\text{L}_1}$  value can be calculated from any point on the exponential curve. The average value of the  $\text{pFe}$  calculated from the experimental ratio points is 28.8.
